# Supplementary material for: Theoretical prediction of superatom WSi12-based catalysts for CO oxidation by N2O
Source: Royal Society of Chemistry journal article supplement (doi:10.1039/d3cp05363f), 2023-01-01
Supplement: d3cp05363f1.pdf [file d3cp05363f1.pdf]

Supporting information for

**Theoretical prediction of superatom WSi<sub>12</sub>-based catalysts for CO  
oxidation by N<sub>2</sub>O**

Ya-Ling Ye,<sup>a,b</sup> Zhi-Chao Zhang,<sup>a</sup> Bi-Lian Ni,<sup>a</sup> Dan Yu,<sup>c</sup> Jing-Hua Chen,<sup>a</sup> Wei-Ming Sun<sup>\*a,d</sup>

<sup>a</sup>*Fujian Key Laboratory of Drug Target Discovery and Structural and Functional Research, Higher Educational Key Laboratory for Nano Biomedical Technology of Fujian Province, The School of Pharmacy, Fujian Medical University, Fuzhou, Fujian, 350108, People's Republic of China.*

*E-mail address: [sunwm@fjmu.edu.cn](mailto:sunwm@fjmu.edu.cn)*

<sup>b</sup>*Department of Pharmacy, Nanping First Hospital Affiliated to Fujian Medical University, Nanping, Fujian, 353006, People's Republic of China*

<sup>c</sup>*School of Environmental Science and Engineering, Guangzhou University, Guangdong, Guangzhou, 510006, People's Republic of China*

<sup>d</sup>*School of Chemistry and Materials Science, University of Science and Technology of China, Hefei, Anhui, 230026, People's Republic of China*

## Table of Contents

|                                                                                                                                                                                                                            |            |
|----------------------------------------------------------------------------------------------------------------------------------------------------------------------------------------------------------------------------|------------|
| <b>1. Tables</b> .....                                                                                                                                                                                                     | <b>S3</b>  |
| <b>Table S1.</b> Relatively energies of $\text{MSi}_{12}$ , $\text{W}_n\text{Si}_{6(n+1)}$ , $\text{MSi}_{12}\text{-N}_2\text{O}$ , and $\text{W}_n\text{Si}_{6(n+1)}\text{-N}_2\text{O}$ under different spin states..... | <b>S3</b>  |
| <b>2. Figures</b> .....                                                                                                                                                                                                    | <b>S4</b>  |
| <b>Figure S1.</b> Low-lying isomers of $\text{WSi}_{12}\text{-N}_2\text{O}$ and $\text{WSi}_{12}\text{-CO}$ .....                                                                                                          | <b>S4</b>  |
| <b>Figure S2.</b> The HOMO and LUMO of (a) $\text{WSi}_{12}\text{-N}_2\text{O}$ and (b) $\text{WSi}_{12}\text{-O}^*$ .....                                                                                                 | <b>S5</b>  |
| <b>Figure S3.</b> The NPA charge distribution of bare $\text{WSi}_{12}$ superatom, free $\text{N}_2\text{O}$ molecule, and the most stable $\text{WSi}_{12}\text{-N}_2\text{O}$ compound.....                              | <b>S6</b>  |
| <b>Figure S4.</b> Optimized structures of $\text{W-N}_2\text{O}$ and $\text{Si}_{12}\text{-N}_2\text{O}$ compounds.....                                                                                                    | <b>S7</b>  |
| <b>Figure S5.</b> Time evolution of the potential energies and structures of $\text{WSi}_{12}\text{-N}_2\text{O}$ and $\text{WSi}_{12}\text{-CO}$ during ADMP simulation.....                                              | <b>S8</b>  |
| <b>Figure S6.</b> The optimized structures of $\text{CrSi}_{12}$ and $\text{MoSi}_{12}$ clusters.....                                                                                                                      | <b>S9</b>  |
| <b>Figure S7.</b> Optimized structures of the species in the reaction coordinate of the CO oxidation by $\text{N}_2\text{O}$ reaction on $\text{CrSi}_{12}$ and $\text{MoSi}_{12}$ clusters.....                           | <b>S10</b> |
| <b>Figure S8.</b> The evolution of NPA charges on the $\text{MSi}_{12}$ ( $\text{M} = \text{Cr}, \text{Mo}, \text{W}$ ) units during the catalytic CO oxidation reaction.....                                              | <b>S11</b> |
| <b>Figure S9.</b> Optimized structures of the species in the reaction coordinate of the CO oxidation by $\text{N}_2\text{O}$ reaction on $\text{W}_n\text{Si}_{6(n+1)}$ ( $n = 4$ and $6$ ) clusters.....                  | <b>S12</b> |
| <b>Figure S10.</b> The evolution of NPA charges on the $\text{W}_n\text{Si}_{6(n+1)}$ ( $n = 2, 4, 6$ ) units during the catalytic CO oxidation reaction.....                                                              | <b>S13</b> |
| <b>Figure S11.</b> Absorption spectra of $\text{MSi}_{12}$ ( $\text{M} = \text{Cr}, \text{Mo}, \text{W}$ ) and $\text{W}_n\text{Si}_{6(n+1)}$ ( $n = 2, 4, 6$ ) clusters.....                                              | <b>S14</b> |
| <b>Figure S12.</b> The energy profiles and corresponding structures for the CO oxidation by two adsorbed $\text{N}_2\text{O}$ molecules on $\text{WSi}_{12}$ .....                                                         | <b>S15</b> |
| <b>3. Cartesian coordinates</b> .....                                                                                                                                                                                      | <b>S16</b> |

## 1. Table

**Table S1.** The relatively energies (in kcal/mol) of  $\text{MSi}_{12}$  ( $M = \text{Cr, Mo, and W}$ ),  $\text{W}_n\text{Si}_{6(n+1)}$  ( $n = 2, 4, \text{ and } 6$ ),  $\text{MSi}_{12}\text{-N}_2\text{O}$ , and  $\text{W}_n\text{Si}_{6(n+1)}\text{-N}_2\text{O}$  compounds in different spin states at the B3PW91-D3(BJ)/6-311+G(d)&LANL2DZ level.

| Structures                                    | Singlet     | Triplet | Quintet |
|-----------------------------------------------|-------------|---------|---------|
| $\text{CrSi}_{12}$                            | <b>0.00</b> | 5.88    | 28.43   |
| $\text{MoSi}_{12}$                            | <b>0.00</b> | 23.08   | 51.92   |
| $\text{WSi}_{12}$                             | <b>0.00</b> | 33.65   | 48.93   |
| $\text{W}_2\text{Si}_{18}$                    | <b>0.00</b> | 30.08   | 39.93   |
| $\text{W}_4\text{Si}_{30}$                    | <b>0.00</b> | 21.30   | 36.14   |
| $\text{W}_6\text{Si}_{42}$                    | <b>0.00</b> | 20.67   | 22.62   |
| $\text{CrSi}_{12}\text{-N}_2\text{O}$         | <b>0.00</b> | 3.26    | 28.75   |
| $\text{MoSi}_{12}\text{-N}_2\text{O}$         | <b>0.00</b> | 21.04   | 33.96   |
| $\text{WSi}_{12}\text{-N}_2\text{O}$          | <b>0.00</b> | 30.74   | 34.01   |
| $\text{W}_2\text{Si}_{18}\text{-N}_2\text{O}$ | <b>0.00</b> | 26.38   | 30.04   |
| $\text{W}_4\text{Si}_{30}\text{-N}_2\text{O}$ | <b>0.00</b> | 20.84   | 24.35   |
| $\text{W}_6\text{Si}_{42}\text{-N}_2\text{O}$ | <b>0.00</b> | 19.69   | 21.50   |

## 2. Figures

**Figure S1.** Low-lying isomers of  $\text{WSi}_{12}\text{-N}_2\text{O}$  and  $\text{WSi}_{12}\text{-CO}$  with relative energies and selected bond lengths.

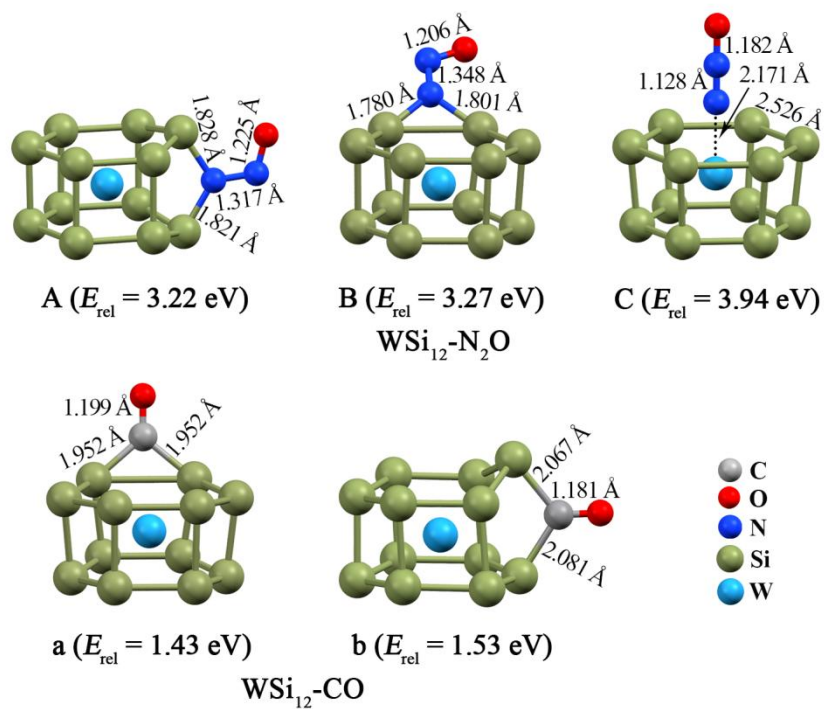

**Figure S2.** The HOMO and LUMO orbitals of (a)  $\text{WSi}_{12}\text{-N}_2\text{O}$  compound and (b)  $\text{WSi}_{12}\text{-O}^*$  intermediate.

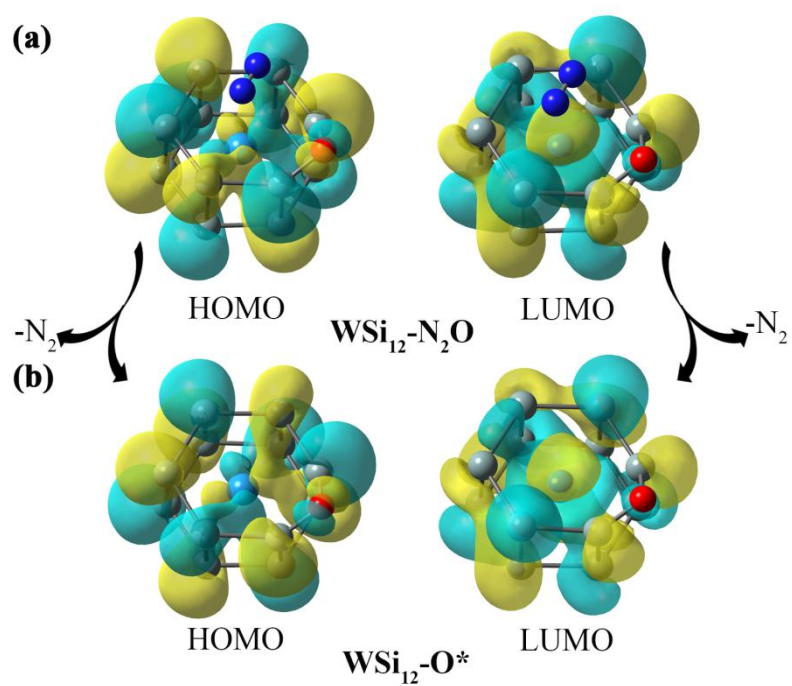

**Figure S3.** The NPA charge distribution of bare  $\text{WSi}_{12}$  superatom, free  $\text{N}_2\text{O}$  molecule, and the most stable  $\text{WSi}_{12}\text{-N}_2\text{O}$  compound.

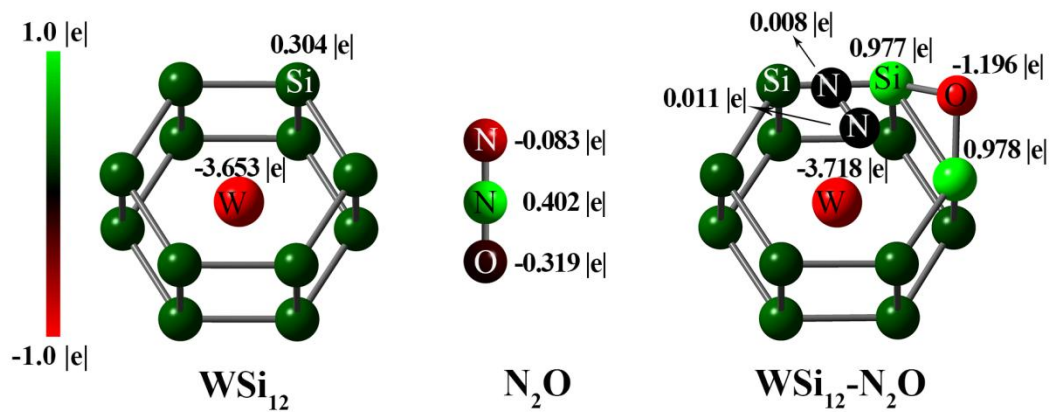

**Figure S4.** Optimized structures of W-N<sub>2</sub>O and Si<sub>12</sub>-N<sub>2</sub>O compounds, where the Si<sub>12</sub> unit retains its geometric coordinates in the most stable WSi<sub>12</sub> superatom. Selected bond lengths and adsorption energies are also shown.

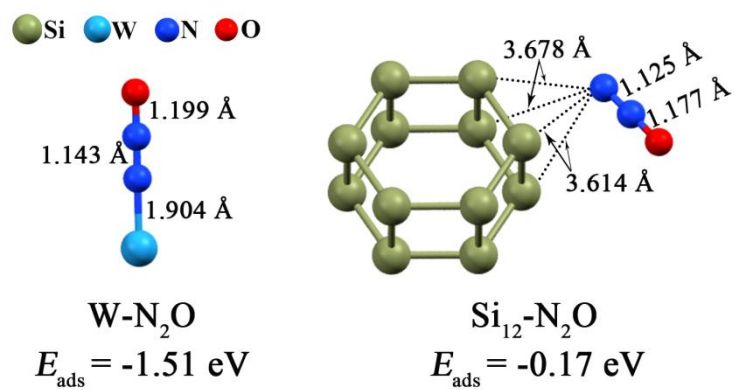

**Figure S5.** Time evolution of the potential energies and structures of (a)  $\text{WSi}_{12}\text{-N}_2\text{O}$  and (b)  $\text{WSi}_{12}\text{-CO}$  during the full length of 300 fs ADMP MD simulation.

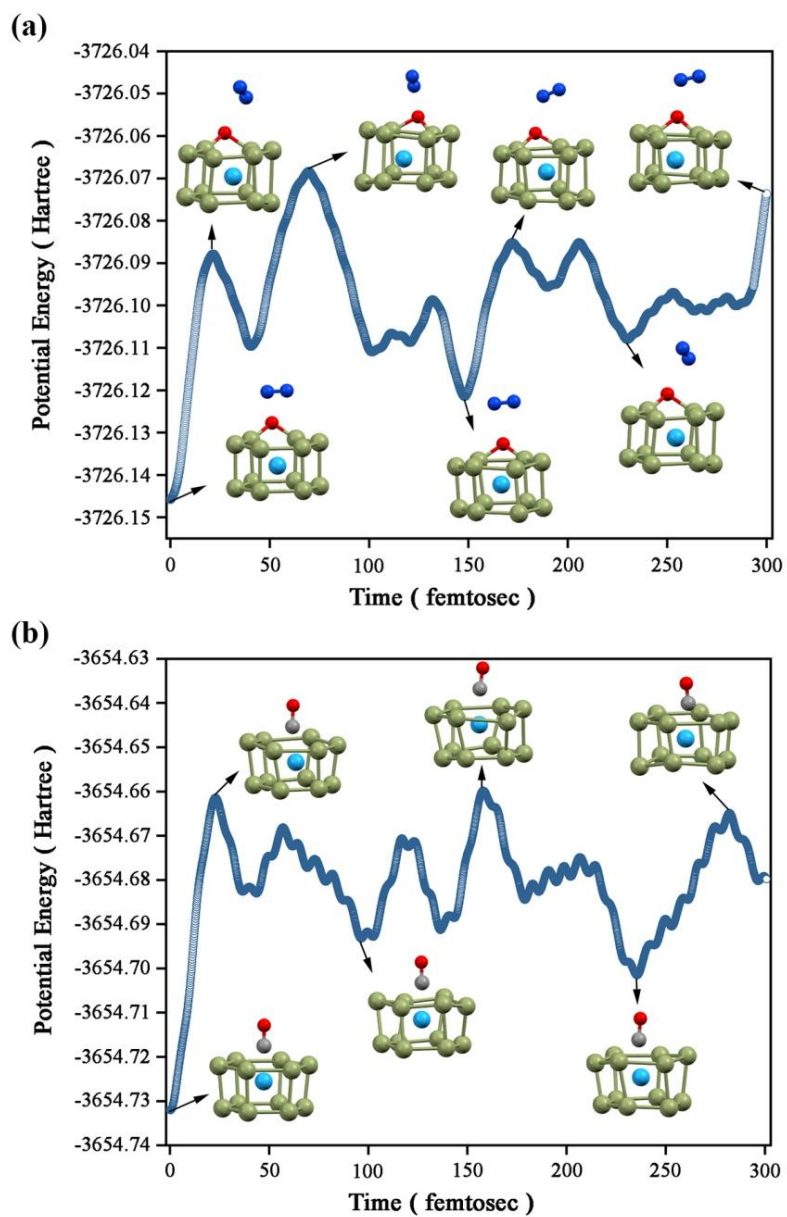



**Figure S6.** The optimized structures of  $\text{CrSi}_{12}$  and  $\text{MoSi}_{12}$  clusters with symmetric group points in the brackets.

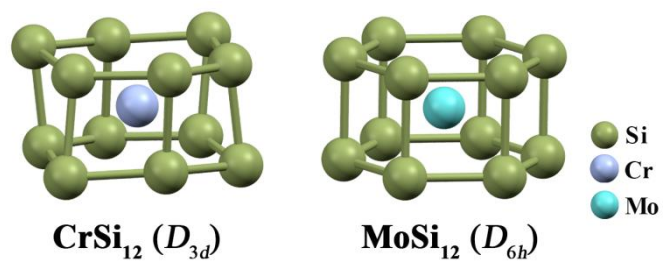

**Figure S7.** Optimized structures of the species involved in the reaction pathway of the CO oxidation by  $N_2O$  reaction on (a)  $CrSi_{12}$  and (b)  $MoSi_{12}$  clusters. Selected bond lengths (in Å) are also shown.

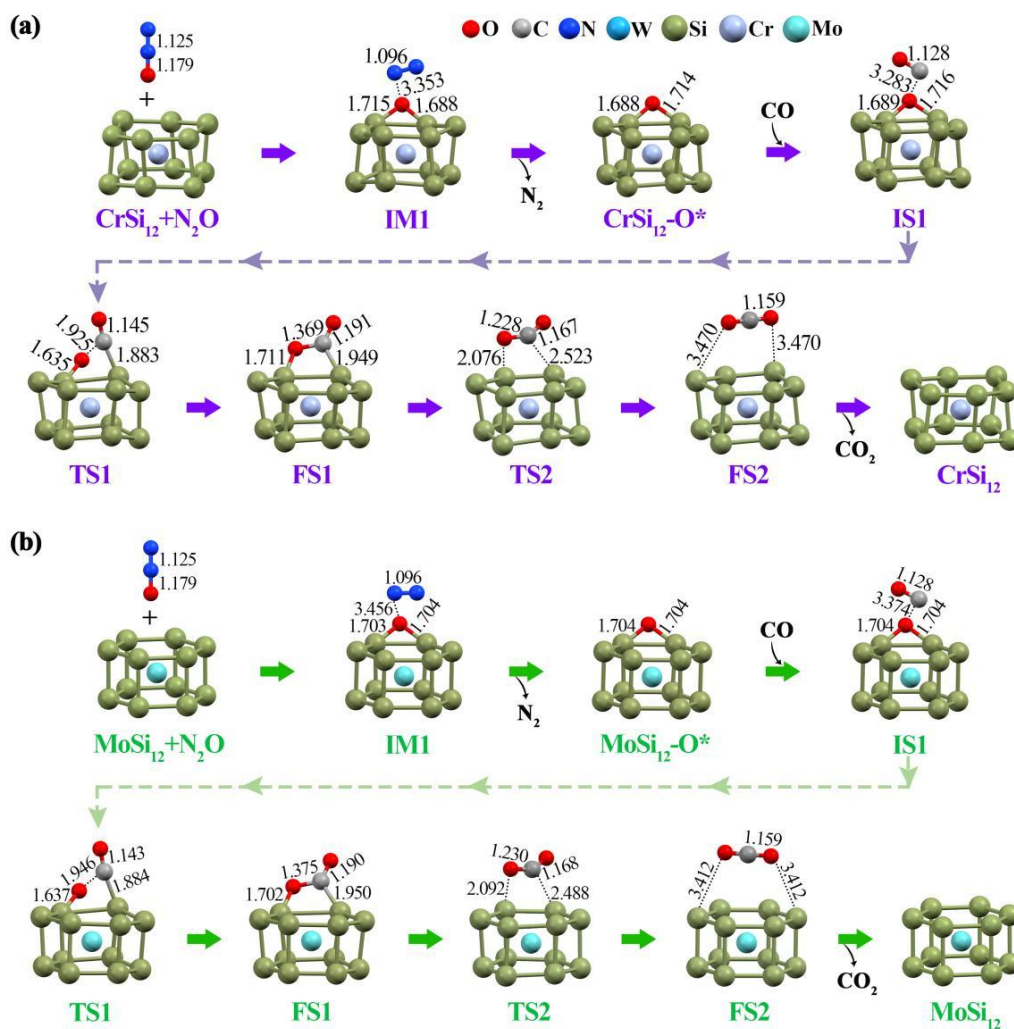

**Figure S8.** The evolution of NPA charges on the  $\text{MSi}_{12}$  ( $M = \text{Cr}, \text{Mo}, \text{and W}$ ) units during the catalytic CO oxidation reaction.

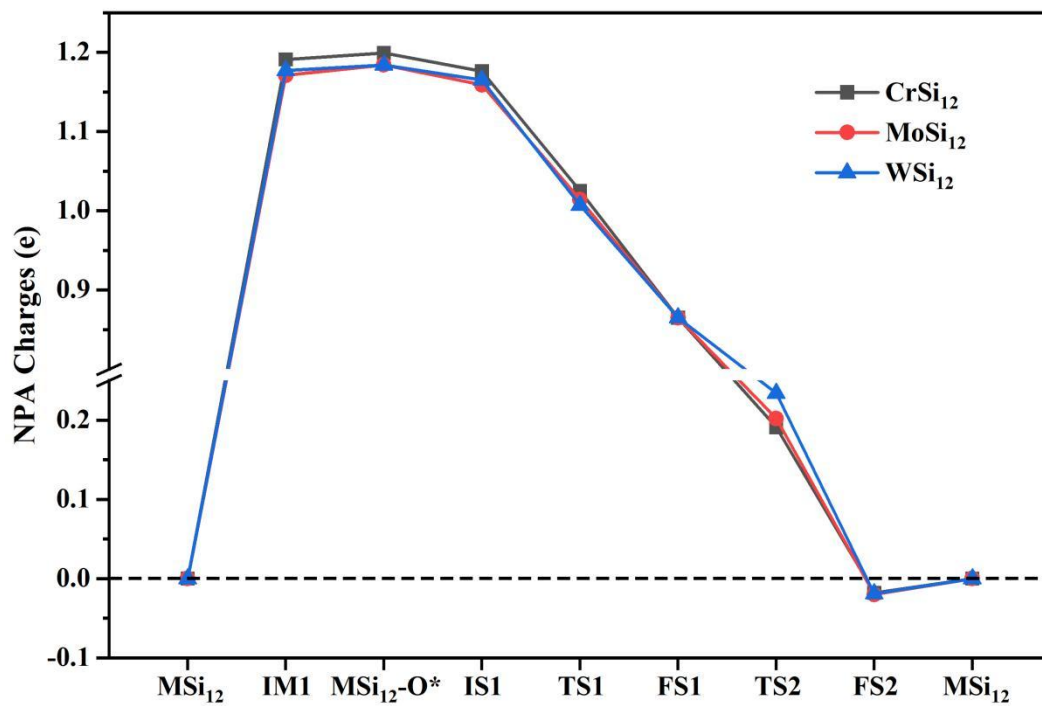

**Figure S9.** Optimized structures of the species involved in the reaction pathways of the CO oxidation by  $N_2O$  reaction on (a)  $W_4Si_{30}$  and (b)  $W_6Si_{42}$  clusters. Selected bond lengths (in Å) are also shown.

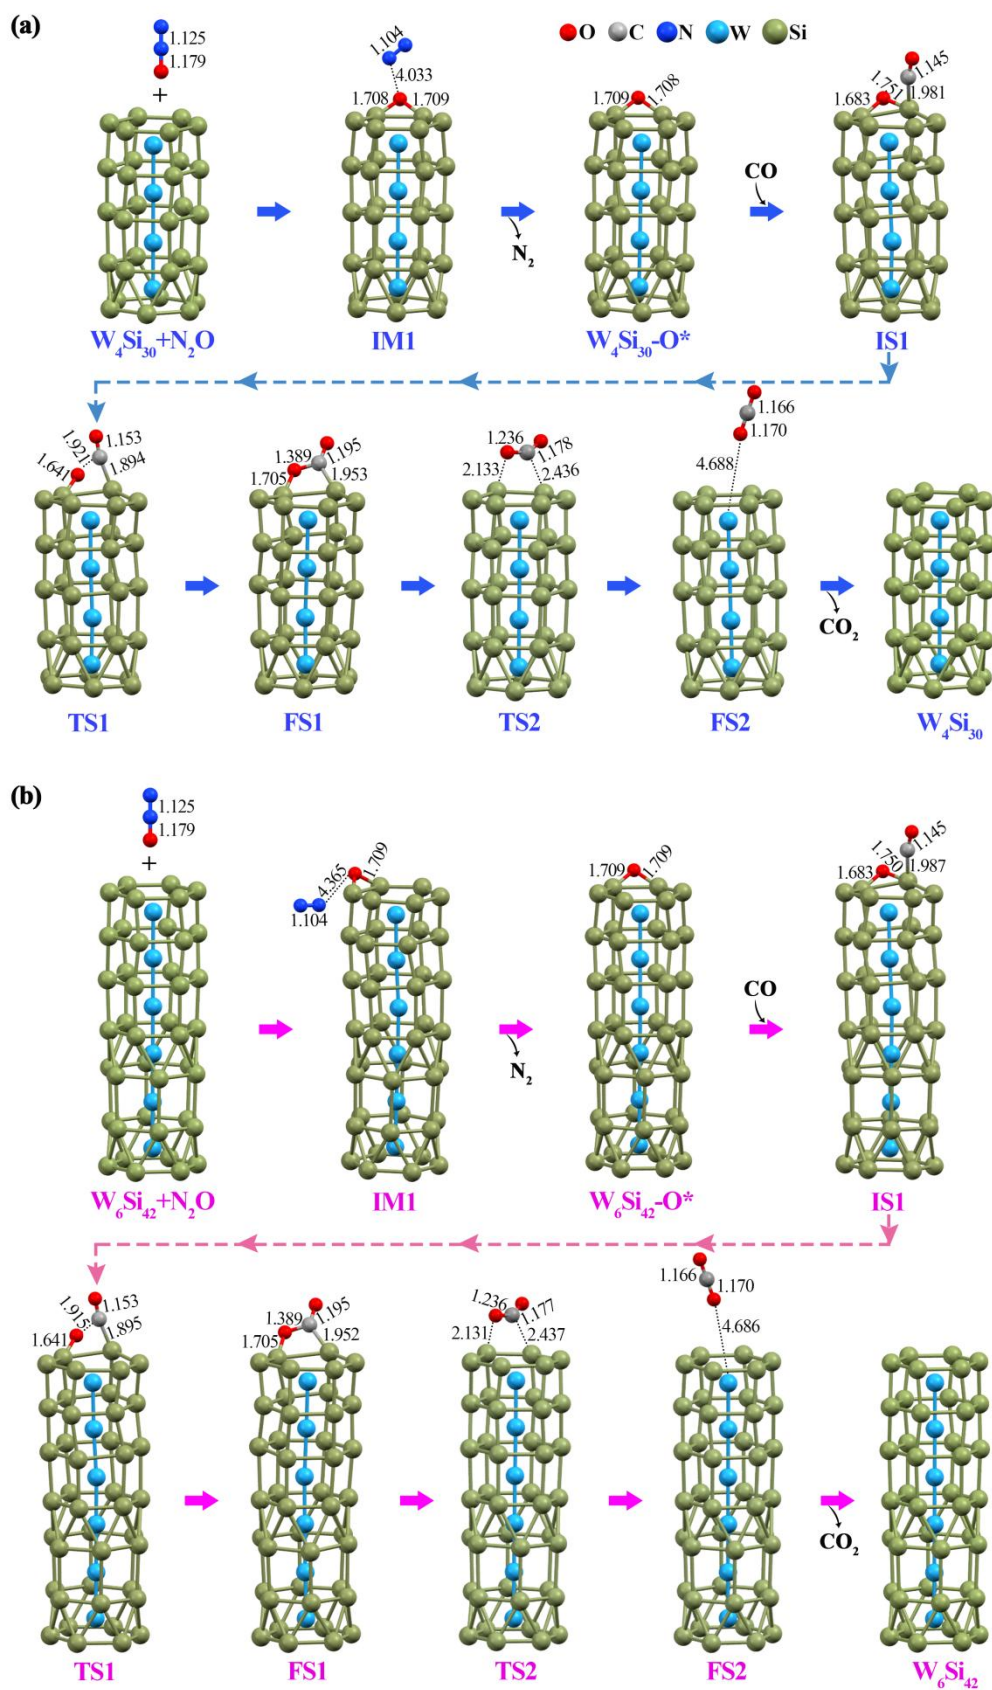



**Figure S10.** The evolution of NPA charges on the  $W_nSi_{6(n+1)}$  ( $n = 2, 4, 6$ ) units during the catalytic CO oxidation reaction.

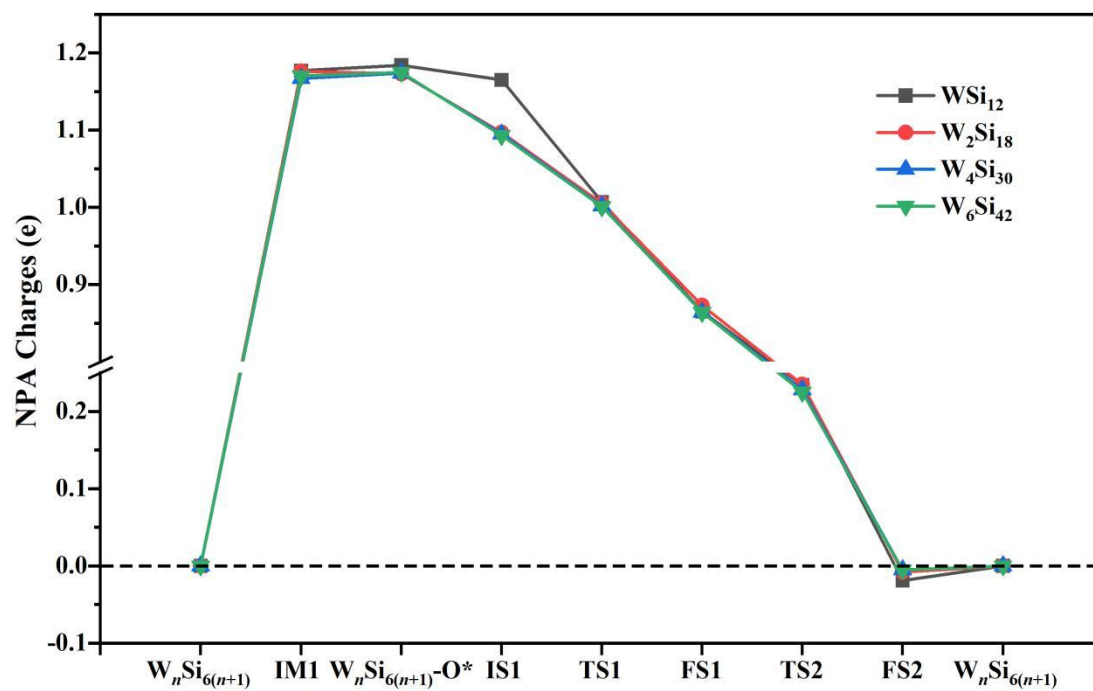

**Figure S11.** Absorption spectra of  $\text{MSi}_{12}$  ( $\text{M} = \text{Cr}, \text{Mo}, \text{W}$ ) and  $\text{W}_n\text{Si}_{6(n+1)}$  ( $n = 2, 4, 6$ ) clusters. All the optical absorption spectra were reflected under a full-width at half-maximum of 0.05 eV.

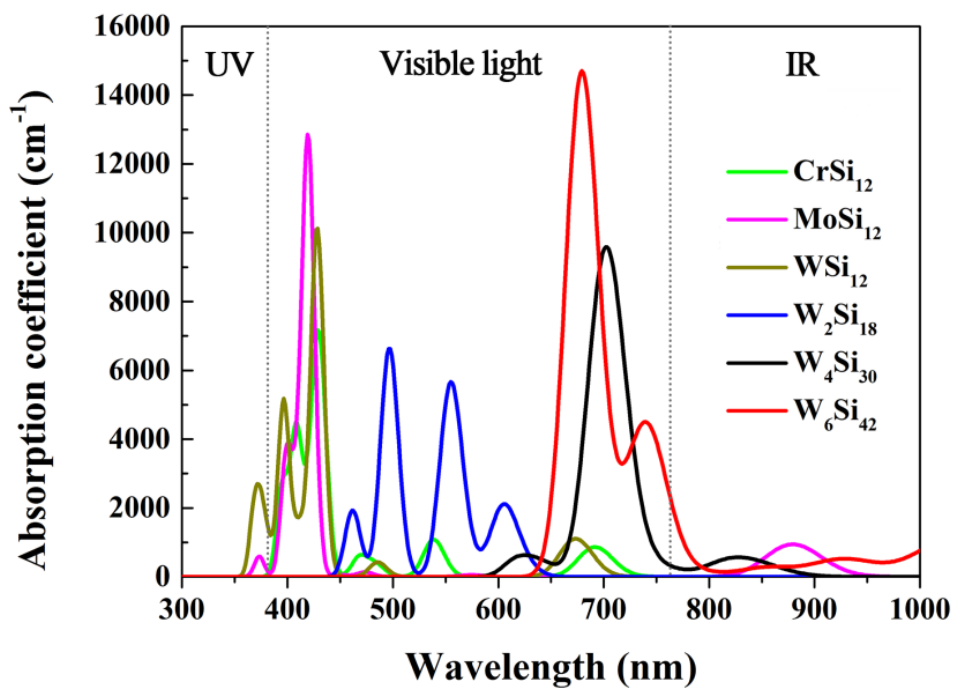

**Figure S12.** (a) Optimized structures of the species involved in the reaction pathways of the CO oxidation by two adsorbed N<sub>2</sub>O molecules on WSi<sub>12</sub>. (b) The potential energy profile of the CO oxidation by two adsorbed N<sub>2</sub>O molecules on WSi<sub>12</sub>.

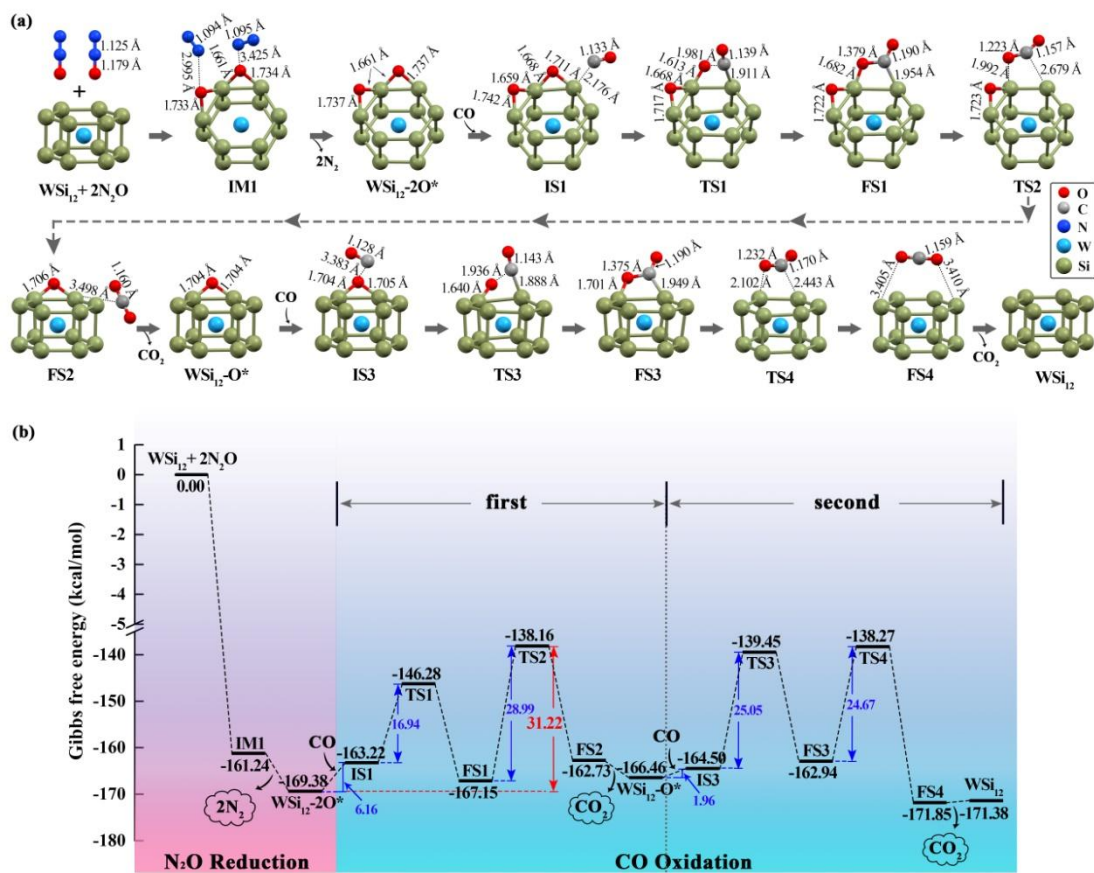



### 3. Cartesian Coordinates

(1)  $\text{MSi}_{12}$  (M = Cr, Mo, and W) and  $\text{W}_n\text{Si}_{6(n+1)}$  ( $n = 2, 4,$  and  $6$ ) clusters

#### **CrSi<sub>12</sub>**

|    |             |             |             |
|----|-------------|-------------|-------------|
| Si | 0.00000000  | 2.20559800  | 1.08731000  |
| Si | 2.14273900  | 1.23711100  | 1.28493100  |
| Si | 1.91010400  | -1.10279900 | 1.08731000  |
| Si | 0.00000000  | -2.47422200 | 1.28493100  |
| Si | -1.91010400 | -1.10279900 | 1.08731000  |
| Si | -2.14273900 | 1.23711100  | 1.28493100  |
| Si | 0.00000000  | 2.47422200  | -1.28493100 |
| Si | 1.91010400  | 1.10279900  | -1.08731000 |
| Si | 2.14273900  | -1.23711100 | -1.28493100 |
| Si | 0.00000000  | -2.20559800 | -1.08731000 |
| Si | -2.14273900 | -1.23711100 | -1.28493100 |
| Si | -1.91010400 | 1.10279900  | -1.08731000 |
| Cr | 0.00000000  | 0.00000000  | 0.00000000  |

#### **MoSi<sub>12</sub>**

|    |             |             |             |
|----|-------------|-------------|-------------|
| Si | 0.00000000  | 2.36379300  | 1.20351600  |
| Si | 2.04710500  | 1.18189700  | 1.20351600  |
| Si | 2.04710500  | -1.18189700 | 1.20351600  |
| Si | 0.00000000  | -2.36379300 | 1.20351600  |
| Si | -2.04710500 | -1.18189700 | 1.20351600  |
| Si | -2.04710500 | 1.18189700  | 1.20351600  |
| Si | 0.00000000  | 2.36379300  | -1.20351600 |
| Si | 2.04710500  | 1.18189700  | -1.20351600 |
| Si | 2.04710500  | -1.18189700 | -1.20351600 |
| Si | 0.00000000  | -2.36379300 | -1.20351600 |
| Si | -2.04710500 | -1.18189700 | -1.20351600 |
| Si | -2.04710500 | 1.18189700  | -1.20351600 |
| Mo | 0.00000000  | 0.00000000  | 0.00000000  |

#### **WSi<sub>12</sub>**

|    |             |             |             |
|----|-------------|-------------|-------------|
| Si | 0.00000000  | 2.36314600  | 1.20888100  |
| Si | 2.04654400  | 1.18157300  | 1.20888100  |
| Si | 2.04654400  | -1.18157300 | 1.20888100  |
| Si | 0.00000000  | -2.36314600 | 1.20888100  |
| Si | -2.04654400 | -1.18157300 | 1.20888100  |
| Si | -2.04654400 | 1.18157300  | 1.20888100  |
| Si | 0.00000000  | 2.36314600  | -1.20888100 |
| Si | 2.04654400  | 1.18157300  | -1.20888100 |
| Si | 2.04654400  | -1.18157300 | -1.20888100 |
| Si | 0.00000000  | -2.36314600 | -1.20888100 |
| Si | -2.04654400 | -1.18157300 | -1.20888100 |

|    |             |            |             |
|----|-------------|------------|-------------|
| Si | -2.04654400 | 1.18157300 | -1.20888100 |
| W  | 0.00000000  | 0.00000000 | 0.00000000  |

**W<sub>2</sub>Si<sub>18</sub>**

|    |             |             |             |
|----|-------------|-------------|-------------|
| Si | -2.07978800 | -1.20076600 | 2.37240700  |
| Si | -2.07978800 | 1.20076600  | 2.37240700  |
| Si | 0.00000000  | 2.40153300  | 2.37240700  |
| Si | 2.07978800  | 1.20076600  | 2.37240700  |
| Si | 2.07978800  | -1.20076600 | 2.37240700  |
| Si | 0.00000000  | -2.40153300 | 2.37240700  |
| Si | -2.27329000 | -1.06617700 | 0.00000000  |
| Si | -2.05998200 | 1.43563800  | 0.00000000  |
| Si | 0.21330800  | 2.50181600  | 0.00000000  |
| Si | 2.27329000  | 1.06617700  | 0.00000000  |
| Si | 2.05998200  | -1.43563800 | 0.00000000  |
| Si | -0.21330800 | -2.50181600 | 0.00000000  |
| W  | 0.00000000  | 0.00000000  | 1.24701500  |
| Si | -2.07978800 | 1.20076600  | -2.37240700 |
| Si | -2.07978800 | -1.20076600 | -2.37240700 |
| Si | 0.00000000  | -2.40153300 | -2.37240700 |
| Si | 2.07978800  | -1.20076600 | -2.37240700 |
| Si | 2.07978800  | 1.20076600  | -2.37240700 |
| Si | 0.00000000  | 2.40153300  | -2.37240700 |
| W  | 0.00000000  | 0.00000000  | -1.24701500 |

**W<sub>4</sub>Si<sub>30</sub>**

|    |             |             |             |
|----|-------------|-------------|-------------|
| Si | -2.14130400 | -1.23628200 | 4.87538700  |
| Si | -2.14130400 | 1.23628200  | 4.87538700  |
| Si | 0.00000000  | 2.47256400  | 4.87538700  |
| Si | 2.14130400  | 1.23628200  | 4.87538700  |
| Si | 2.14130400  | -1.23628200 | 4.87538700  |
| Si | 0.00000000  | -2.47256400 | 4.87538700  |
| Si | -2.42371600 | -0.01014800 | 2.62980400  |
| Si | -1.22064600 | 2.09392600  | 2.62980400  |
| Si | 1.20307000  | 2.10407300  | 2.62980400  |
| Si | 2.42371600  | 0.01014800  | 2.62980400  |
| Si | 1.22064600  | -2.09392600 | 2.62980400  |
| Si | -1.20307000 | -2.10407300 | 2.62980400  |
| W  | 0.00000000  | 0.00000000  | 3.96925100  |
| Si | -2.50231700 | -0.09296400 | -0.16321800 |
| Si | -1.33166800 | 2.12058800  | -0.16321800 |
| Si | 1.17065000  | 2.21355200  | -0.16321800 |
| Si | 2.50231700  | 0.09296400  | -0.16321800 |
| Si | 1.33166800  | -2.12058800 | -0.16321800 |

|    |             |             |             |
|----|-------------|-------------|-------------|
| Si | -1.17065000 | -2.21355200 | -0.16321800 |
| W  | 0.00000000  | 0.00000000  | 1.44167900  |
| Si | -2.48018200 | 0.15284800  | -2.60607500 |
| Si | -1.10772100 | 2.22432400  | -2.60607500 |
| Si | 1.37246100  | 2.07147700  | -2.60607500 |
| Si | 2.48018200  | -0.15284800 | -2.60607500 |
| Si | 1.10772100  | -2.22432400 | -2.60607500 |
| Si | -1.37246100 | -2.07147700 | -2.60607500 |
| W  | 0.00000000  | 0.00000000  | -1.26670100 |
| Si | -2.38464300 | -0.05809800 | -4.98780000 |
| Si | -1.24263600 | 2.03611200  | -4.98780000 |
| Si | 1.14200700  | 2.09421100  | -4.98780000 |
| Si | 2.38464300  | 0.05809800  | -4.98780000 |
| Si | 1.24263600  | -2.03611200 | -4.98780000 |
| Si | -1.14200700 | -2.09421100 | -4.98780000 |
| W  | 0.00000000  | 0.00000000  | -3.85828500 |

**W<sub>6</sub>Si<sub>42</sub>**

|    |             |             |             |
|----|-------------|-------------|-------------|
| Si | 2.20037800  | 1.25135400  | 2.31414900  |
| Si | 2.18389300  | -1.27990600 | 2.31414900  |
| Si | -0.01648500 | -2.53126000 | 2.31414900  |
| Si | -2.20037800 | -1.25135400 | 2.31414900  |
| Si | -2.18389300 | 1.27990600  | 2.31414900  |
| Si | 0.01648500  | 2.53126000  | 2.31414900  |
| Si | 2.40439400  | 0.00000000  | 0.03086300  |
| Si | 1.20219700  | -2.08226600 | 0.03086300  |
| Si | -1.20219700 | -2.08226600 | 0.03086300  |
| Si | -2.40439400 | 0.00000000  | 0.03086300  |
| Si | -1.20219700 | 2.08226600  | 0.03086300  |
| Si | 1.20219700  | 2.08226600  | 0.03086300  |
| W  | 0.00000000  | 0.00000000  | 1.37704700  |
| Si | 2.49550600  | 0.06642400  | -2.75454300 |
| Si | 1.30527800  | -2.12796000 | -2.75454300 |
| Si | -1.19022800 | -2.19438400 | -2.75454300 |
| Si | -2.49550600 | -0.06642400 | -2.75454300 |
| Si | -1.30527800 | 2.12796000  | -2.75454300 |
| Si | 1.19022800  | 2.19438400  | -2.75454300 |
| W  | 0.00000000  | 0.00000000  | -1.23330300 |
| Si | 2.47746000  | -0.19912600 | -5.19930800 |
| Si | 1.06628200  | -2.24510600 | -5.19930800 |
| Si | -1.41117800 | -2.04598000 | -5.19930800 |
| Si | -2.47746000 | 0.19912600  | -5.19930800 |
| Si | -1.06628200 | 2.24510600  | -5.19930800 |
| Si | 1.41117800  | 2.04598000  | -5.19930800 |

|    |             |             |             |
|----|-------------|-------------|-------------|
| W  | 0.00000000  | 0.00000000  | -3.90205700 |
| Si | 2.39322000  | 0.04442100  | -7.58066700 |
| Si | 1.23508000  | -2.05037900 | -7.58066700 |
| Si | -1.15814000 | -2.09480000 | -7.58066700 |
| Si | -2.39322000 | -0.04442100 | -7.58066700 |
| Si | -1.23508000 | 2.05037900  | -7.58066700 |
| Si | 1.15814000  | 2.09480000  | -7.58066700 |
| W  | 0.00000000  | 0.00000000  | -6.46075500 |
| Si | 2.45683600  | -0.02732400 | 7.52727400  |
| Si | 1.20475500  | -2.14134400 | 7.52727400  |
| Si | -1.25208100 | -2.11402000 | 7.52727400  |
| Si | -2.45683600 | 0.02732400  | 7.52727400  |
| Si | -1.20475500 | 2.14134400  | 7.52727400  |
| Si | 1.25208100  | 2.11402000  | 7.52727400  |
| Si | 2.09037900  | -1.23608000 | 5.28255600  |
| Si | -0.02528700 | -2.42836100 | 5.28255600  |
| Si | -2.11566600 | -1.19228100 | 5.28255600  |
| Si | -2.09037900 | 1.23608000  | 5.28255600  |
| Si | 0.02528700  | 2.42836100  | 5.28255600  |
| Si | 2.11566600  | 1.19228100  | 5.28255600  |
| W  | 0.00000000  | 0.00000000  | 6.60801600  |
| W  | 0.00000000  | 0.00000000  | 4.04203600  |

(2)  $\text{WSi}_{12}\text{-N}_2\text{O}$  and  $\text{WSi}_{12}\text{-CO}$  compounds

**$\text{WSi}_{12}\text{-N}_2\text{O}$**

|          |             |             |             |
|----------|-------------|-------------|-------------|
| Si       | 0.38093200  | -0.35411100 | -2.49244700 |
| Si       | 2.08810200  | -0.84271300 | -1.01485700 |
| Si       | 2.11312200  | 0.36000900  | 1.21481000  |
| Si       | 0.43529800  | 1.88407000  | 1.65464500  |
| Si       | -1.30636100 | 2.29037300  | 0.12052700  |
| Si       | -1.33292100 | 1.17164400  | -1.95701700 |
| Si       | -0.85918200 | -2.23348500 | -1.46510400 |
| Si       | 0.89380200  | -2.59743300 | 0.04454300  |
| Si       | 0.92135000  | -1.47596000 | 2.12690500  |
| Si       | -0.80425200 | 0.00650600  | 2.68358500  |
| Si       | -2.55459600 | 0.49018300  | 1.13900800  |
| Si       | -2.58049300 | -0.65515700 | -0.98477400 |
| W        | -0.24068100 | -0.18042100 | 0.09862800  |
| N        | 2.07137500  | 3.17361300  | -1.08762100 |
| N        | 2.02271100  | 2.63825500  | -2.04227800 |
| O        | 3.20307200  | 0.00664300  | -0.04583700 |
| <b>A</b> |             |             |             |
| Si       | 0.95742800  | -2.02716000 | -1.11303400 |
| Si       | 2.06080600  | 0.00005300  | -1.29897000 |

|          |             |             |             |
|----------|-------------|-------------|-------------|
| Si       | 0.95733600  | 2.02721600  | -1.11304500 |
| Si       | -1.39399500 | 2.02973400  | -1.29203900 |
| Si       | -2.59812800 | -0.00006400 | -1.44440700 |
| Si       | -1.39389900 | -2.02980100 | -1.29201300 |
| Si       | 0.70444300  | -1.99973100 | 1.30419700  |
| Si       | 1.80469400  | 0.00003100  | 1.80558900  |
| Si       | 0.70441200  | 1.99976400  | 1.30417600  |
| Si       | -1.65411000 | 2.06890500  | 1.13265700  |
| Si       | -2.80303100 | -0.00001500 | 0.96232800  |
| Si       | -1.65408000 | -2.06892000 | 1.13266700  |
| W        | -0.35357500 | -0.00000100 | 0.01665800  |
| N        | 4.19565700  | -0.00001600 | 0.29226900  |
| N        | 2.87968000  | 0.00004600  | 0.33519100  |
| O        | 4.61887400  | -0.00003700 | -0.85730100 |
| <b>B</b> |             |             |             |
| Si       | -0.50865100 | 2.31711300  | 1.38951400  |
| Si       | 1.22924200  | 0.89061700  | 2.02773800  |
| Si       | 0.91458800  | -1.44855800 | 1.93094800  |
| Si       | -1.12288400 | -2.29462300 | 1.15082600  |
| Si       | -2.82531700 | -0.87973000 | 0.33184000  |
| Si       | -2.50101000 | 1.47148600  | 0.45488000  |
| Si       | 0.35955700  | 2.40811100  | -0.89048800 |
| Si       | 2.10169500  | 1.09758200  | -0.15916800 |
| Si       | 1.70494800  | -1.63780600 | -0.28934400 |
| Si       | -0.29652100 | -2.38753500 | -1.15527600 |
| Si       | -1.93998900 | -0.86586200 | -1.91826700 |
| Si       | -1.61809500 | 1.48676200  | -1.79540500 |
| W        | -0.34383800 | 0.00457700  | 0.06657700  |
| N        | 4.22398700  | -0.53932000 | -0.98073600 |
| N        | 2.90344600  | -0.40400900 | -0.74748600 |
| O        | 4.82326200  | 0.50735600  | -0.98979100 |
| <b>C</b> |             |             |             |
| Si       | 1.58948700  | -1.96407500 | -1.18176300 |
| Si       | 1.58754300  | -2.00528600 | 1.11275100  |
| Si       | 1.58320200  | -0.03871300 | 2.29575300  |
| Si       | 1.58100700  | 1.96927700  | 1.18447700  |
| Si       | 1.58275500  | 2.01038400  | -1.11003800 |
| Si       | 1.58709300  | 0.04387000  | -2.29314400 |
| Si       | -0.77613000 | -2.16597000 | -1.30250700 |
| Si       | -0.77817800 | -2.21131500 | 1.22271800  |
| Si       | -0.78325300 | -0.04691100 | 2.52474100  |
| Si       | -0.78543700 | 2.16332500  | 1.30143500  |
| Si       | -0.78341900 | 2.20899700  | -1.22444700 |
| Si       | -0.77898600 | 0.04384600  | -2.52608600 |

|   |             |             |             |
|---|-------------|-------------|-------------|
| W | 0.06841600  | 0.00003700  | 0.00002900  |
| N | -3.23012600 | -0.00501300 | -0.00268000 |
| N | -2.10228100 | -0.00328800 | -0.00184700 |
| O | -4.41194300 | -0.00608000 | -0.00311900 |

**WSi<sub>12</sub>-CO**

|    |             |             |             |
|----|-------------|-------------|-------------|
| Si | 0.56293000  | -2.23203800 | -1.43334700 |
| Si | 2.21506700  | -0.62875000 | -1.43370200 |
| Si | 1.65162700  | 1.60353500  | -1.43371800 |
| Si | -0.56292300 | 2.23194200  | -1.43345400 |
| Si | -2.21505400 | 0.62869900  | -1.43377800 |
| Si | -1.65164700 | -1.60359000 | -1.43361800 |
| Si | 0.61948700  | -2.45671900 | 0.93902900  |
| Si | 2.43720800  | -0.69143700 | 0.93891000  |
| Si | 1.81758200  | 1.76490000  | 0.93869200  |
| Si | -0.61948200 | 2.45665500  | 0.93883000  |
| Si | -2.43707000 | 0.69164600  | 0.93879300  |
| Si | -1.81777100 | -1.76473400 | 0.93883400  |
| W  | 0.00002000  | -0.00006600 | 0.05006500  |
| C  | -0.00001200 | 0.00012600  | 2.04348800  |
| O  | -0.00009000 | 0.00032400  | 3.19920900  |

**a**

|    |             |             |             |
|----|-------------|-------------|-------------|
| Si | -2.47749600 | -1.18095100 | 0.44285300  |
| Si | -2.47736300 | 1.18120000  | 0.44280800  |
| Si | -0.63752500 | 2.28843500  | 1.34909000  |
| Si | 1.31739400  | 1.17424700  | 1.95445600  |
| Si | 1.31733800  | -1.17437600 | 1.95438500  |
| Si | -0.63776800 | -2.28832100 | 1.34916600  |
| Si | -1.63983700 | -1.21649600 | -1.83543500 |
| Si | -1.63960500 | 1.21678300  | -1.83545400 |
| Si | 0.11511600  | 2.53092300  | -0.92440900 |
| Si | 2.05564800  | 1.48007000  | -0.26208100 |
| Si | 2.05537300  | -1.48039300 | -0.26221700 |
| Si | 0.11462800  | -2.53097400 | -0.92440200 |
| W  | -0.15241300 | 0.00001100  | 0.05223600  |
| C  | 2.96468200  | -0.00021800 | -1.15172000 |
| O  | 3.62098500  | -0.00020300 | -2.15472000 |

**b**

|    |             |             |             |
|----|-------------|-------------|-------------|
| Si | -1.45755400 | 2.02901800  | -1.04848700 |
| Si | -2.70308900 | -0.00000500 | -1.09136400 |
| Si | -1.45754400 | -2.02902200 | -1.04848700 |
| Si | 0.90841900  | -2.08962400 | -1.38432000 |
| Si | 1.89244500  | 0.00000700  | -1.54565700 |
| Si | 0.90840900  | 2.08963200  | -1.38431500 |

|    |             |             |             |
|----|-------------|-------------|-------------|
| Si | -1.30390300 | 2.06577000  | 1.37512100  |
| Si | -2.42440900 | -0.00000700 | 1.29374600  |
| Si | -1.30389200 | -2.06577900 | 1.37512200  |
| Si | 1.02205300  | -1.94720900 | 1.05119200  |
| Si | 2.10959600  | 0.00000500  | 1.82729400  |
| Si | 1.02204300  | 1.94721400  | 1.05119700  |
| W  | -0.20553000 | 0.00000000  | -0.09292800 |
| C  | 3.20091700  | 0.00000900  | 0.07238900  |
| O  | 4.37846400  | -0.00000600 | -0.01902800 |

(3) Transition states involved in the CO oxidation reaction

1) CrSi<sub>12</sub>

**TS1**

|    |             |             |             |
|----|-------------|-------------|-------------|
| Si | -0.52929900 | 2.32904600  | -1.32210000 |
| Si | -1.95859100 | 1.22032700  | 0.12935900  |
| Si | -1.79157500 | -1.47136700 | 0.17588100  |
| Si | 0.20666800  | -2.49001200 | -0.34256100 |
| Si | 1.69397000  | -1.46317000 | -1.86126800 |
| Si | 1.24231900  | 0.89436400  | -1.97502700 |
| Si | 0.76545400  | 2.38016400  | 0.68294300  |
| Si | -0.90530800 | 1.62832800  | 2.16947200  |
| Si | -0.73993200 | -0.73745200 | 2.22427000  |
| Si | 1.18379400  | -2.07456300 | 1.79092800  |
| Si | 2.53179000  | -0.86645200 | 0.25349200  |
| Si | 2.71926600  | 1.45302300  | -0.14933300 |
| O  | -3.24992500 | 0.23292500  | -0.04633200 |
| C  | -2.73215200 | -1.03734000 | -1.39637300 |
| O  | -3.26479300 | -1.00188500 | -2.40876500 |
| Cr | 0.27712000  | 0.04768400  | 0.13142600  |

**TS2**

|    |             |             |             |
|----|-------------|-------------|-------------|
| Si | -0.85033800 | -2.14599500 | 1.17690800  |
| Si | -2.91784300 | -1.32526100 | 0.33596800  |
| Si | -2.66358100 | 1.00865400  | 0.11616500  |
| Si | -1.17659500 | 2.50387200  | 1.20007200  |
| Si | 0.66789700  | 1.22334400  | 1.93668100  |
| Si | 0.99112300  | -1.11218300 | 2.23599800  |
| Si | 0.16607900  | -2.54801900 | -0.94241100 |
| Si | -1.63458100 | -1.19253200 | -1.67939500 |
| Si | -1.80000800 | 1.13951000  | -2.10082100 |
| Si | -0.07109500 | 2.26226900  | -0.91588900 |
| Si | 1.86980300  | 1.31090300  | -0.07129900 |
| Si | 1.72262700  | -1.09191300 | -0.02406200 |
| C  | 3.94084600  | 0.09261000  | -0.84087200 |
| O  | 4.80447800  | 0.87091400  | -0.94203200 |

|    |             |             |             |
|----|-------------|-------------|-------------|
| O  | 3.57125400  | -1.07138400 | -0.96896800 |
| Cr | -0.45415800 | 0.02462600  | 0.10760100  |

## 2) MoSi<sub>12</sub>

### TS1

|    |             |             |             |
|----|-------------|-------------|-------------|
| Si | -0.26138100 | 2.28479900  | -1.29927300 |
| Si | -1.93780100 | 1.45834200  | 0.06729600  |
| Si | -1.96934100 | -1.26723100 | 0.17265700  |
| Si | -0.13661500 | -2.58144100 | -0.40099700 |
| Si | 1.49867200  | -1.55416800 | -1.77071900 |
| Si | 1.40280500  | 0.80483800  | -2.13764100 |
| Si | 1.01819000  | 2.45372500  | 0.73769500  |
| Si | -0.75190200 | 1.64986000  | 2.06987400  |
| Si | -0.89313400 | -0.71761500 | 2.32157600  |
| Si | 0.92164900  | -2.11301800 | 1.69159100  |
| Si | 2.60548700  | -1.15447200 | 0.29488500  |
| Si | 2.74110800  | 1.15923900  | -0.15582000 |
| O  | -3.28410700 | 0.53495700  | -0.04724000 |
| C  | -2.94180100 | -0.83881800 | -1.38266200 |
| O  | -3.50935000 | -0.78606300 | -2.37317800 |
| Mo | 0.30167000  | 0.02670800  | 0.12818100  |

### TS2

|    |             |             |             |
|----|-------------|-------------|-------------|
| Si | -1.00818400 | -2.23234900 | 1.27742300  |
| Si | -2.84691500 | -1.15999200 | 0.20794600  |
| Si | -2.73695800 | 1.19570000  | 0.02861600  |
| Si | -1.02349900 | 2.47081300  | 1.05819100  |
| Si | 0.74134100  | 1.27563400  | 2.10364800  |
| Si | 0.84055400  | -1.09906500 | 2.23754500  |
| Si | 0.04997000  | -2.49977200 | -0.86304100 |
| Si | -1.64522900 | -1.18307000 | -1.86732000 |
| Si | -1.53100800 | 1.17856900  | -2.06036400 |
| Si | 0.23829800  | 2.33301800  | -0.97618800 |
| Si | 1.97541600  | 1.16810000  | 0.08282800  |
| Si | 1.80478100  | -1.27369500 | 0.02335900  |
| C  | 3.92445200  | -0.02274200 | -0.90300500 |
| O  | 4.87241400  | 0.65689100  | -0.85061900 |
| O  | 3.42501500  | -1.07955500 | -1.28594100 |
| Mo | -0.42728800 | 0.02579200  | 0.11841700  |

## 3) WSi<sub>12</sub>

### TS1

|    |             |             |             |
|----|-------------|-------------|-------------|
| Si | -0.29494700 | 2.28126100  | -1.30512100 |
| Si | -1.96530900 | 1.47392600  | 0.07241100  |
| Si | -2.00983300 | -1.24399000 | 0.17322100  |



|    |             |             |             |
|----|-------------|-------------|-------------|
| Si | -0.20967800 | -2.59416400 | -0.42095800 |
| Si | 1.41995600  | -1.55979600 | -1.79319900 |
| Si | 1.34703200  | 0.79364300  | -2.18025100 |
| Si | 1.01239700  | 2.45674800  | 0.72528100  |
| Si | -0.74386500 | 1.63459200  | 2.06066000  |
| Si | -0.90866300 | -0.72752600 | 2.32612400  |
| Si | 0.88929900  | -2.11516800 | 1.65507100  |
| Si | 2.58305700  | -1.17868100 | 0.25884500  |
| Si | 2.70108500  | 1.13631800  | -0.19262900 |
| W  | 0.26865700  | 0.02086600  | 0.10658100  |
| O  | -3.31524600 | 0.54818600  | -0.02683600 |
| C  | -3.01076300 | -0.81385500 | -1.36833900 |
| O  | -3.59769300 | -0.75584600 | -2.34683100 |

### TS2

|    |             |             |             |
|----|-------------|-------------|-------------|
| Si | -1.03320200 | -2.23318300 | 1.26493800  |
| Si | -2.80182900 | -1.10769900 | 0.14285100  |
| Si | -2.67053500 | 1.24625700  | -0.02212300 |
| Si | -0.93537800 | 2.46683500  | 1.02529900  |
| Si | 0.77923800  | 1.26121400  | 2.13628400  |
| Si | 0.80645500  | -1.11141000 | 2.24450100  |
| Si | 0.06962500  | -2.49546000 | -0.86815300 |
| Si | -1.57429000 | -1.16108600 | -1.92455600 |
| Si | -1.39509600 | 1.19669800  | -2.08116000 |
| Si | 0.37689500  | 2.32900300  | -0.98318200 |
| Si | 2.04403700  | 1.11661900  | 0.12889900  |
| Si | 1.85179800  | -1.33323700 | 0.04400100  |
| W  | -0.36637700 | 0.02232600  | 0.10196900  |
| C  | 3.92189000  | -0.04900900 | -0.91218700 |
| O  | 4.89537700  | 0.59546000  | -0.84012400 |
| O  | 3.39619000  | -1.07068300 | -1.35725000 |

### 4) W<sub>2</sub>Si<sub>18</sub>

#### TS1

|    |             |             |             |
|----|-------------|-------------|-------------|
| Si | 2.52633200  | -0.48891900 | -2.48929200 |
| Si | 2.01921900  | -2.47144500 | -1.23220800 |
| Si | 2.14635000  | -2.54970500 | 1.17154600  |
| Si | 2.55166100  | -0.54298300 | 2.36332600  |
| Si | 3.11974200  | 1.47053400  | 1.10486500  |
| Si | 2.96009800  | 1.55452300  | -1.33501200 |
| Si | 0.16725300  | -0.21420100 | -2.46231700 |
| Si | -0.48369300 | -2.16828000 | -1.31429900 |
| Si | -0.19174800 | -2.20488200 | 1.04253900  |
| Si | 0.29693600  | 0.20136100  | 2.46175000  |
| Si | 0.84711800  | 2.23176400  | 1.38495700  |

|    |             |             |             |
|----|-------------|-------------|-------------|
| Si | 0.70451700  | 2.19585800  | -1.04357000 |
| W  | 1.47487700  | -0.21849800 | -0.02233900 |
| Si | -2.73153700 | -1.08641000 | -1.21820400 |
| Si | -1.95668800 | 0.79799600  | -2.48773400 |
| Si | -1.57509000 | 2.73249800  | -1.21556300 |
| Si | -1.59297600 | 2.51457700  | 1.21896000  |
| Si | -2.04060900 | 0.55277100  | 2.63357100  |
| Si | -2.33003900 | -1.39075200 | 1.42518600  |
| W  | -0.97073000 | 0.34326000  | 0.01598900  |
| O  | -3.56348400 | -2.10287100 | 0.60899600  |
| C  | -4.43858900 | -0.72923500 | -0.46969800 |
| O  | -5.53540900 | -0.48928000 | -0.21286400 |

**TS2**

|    |             |             |             |
|----|-------------|-------------|-------------|
| Si | -2.43722200 | -1.14077300 | 2.34512700  |
| Si | -1.82668100 | -2.84669400 | 0.80944800  |
| Si | -1.88138000 | -2.43727900 | -1.56429600 |
| Si | -2.55873200 | -0.31177600 | -2.43294700 |
| Si | -3.23573500 | 1.43769300  | -0.96407000 |
| Si | -3.16778200 | 0.98398300  | 1.41893200  |
| Si | -0.32763000 | -0.07232900 | 2.48994000  |
| Si | 0.45591400  | -2.19510200 | 0.80396400  |
| Si | 0.50190200  | -1.92046300 | -1.55617400 |
| Si | -0.23849900 | 0.22034300  | -2.46477100 |
| Si | -0.98941500 | 2.21673700  | -0.96797900 |
| Si | -0.99931600 | 2.02085200  | 1.52040400  |
| W  | -1.46245500 | -0.35011800 | -0.02160400 |
| Si | 2.62432900  | -1.29095000 | 0.97328200  |
| Si | 1.98667900  | 0.34896000  | 2.52698600  |
| Si | 1.35732600  | 2.49760600  | 1.62109200  |
| Si | 1.23817900  | 2.98704000  | -0.74822400 |
| Si | 1.84109600  | 1.35155900  | -2.35700700 |
| Si | 2.67409900  | -0.68425900 | -1.46568900 |
| W  | 0.89690000  | 0.46105200  | 0.05235000  |
| O  | 4.65753900  | -0.28390100 | -0.80804400 |
| C  | 4.86313300  | -1.18124600 | 0.01797700  |
| O  | 5.64651800  | -1.89531500 | 0.53112700  |

5)  $W_4Si_{30}$

**TS1**

|    |            |             |             |
|----|------------|-------------|-------------|
| Si | 5.10928700 | -1.27586900 | -2.16471800 |
| Si | 4.92752700 | -2.64849100 | -0.10432300 |
| Si | 4.95239100 | -1.50981900 | 2.09426900  |
| Si | 5.10458500 | 0.94674200  | 2.21845300  |
| Si | 5.21582200 | 2.29839300  | 0.15807000  |

|    |             |             |             |
|----|-------------|-------------|-------------|
| Si | 5.22679600  | 1.17974000  | -2.02390900 |
| Si | 2.76516600  | -2.06056300 | -1.38149500 |
| Si | 2.69388800  | -2.20079000 | 1.05403300  |
| Si | 2.78885500  | -0.16107200 | 2.39598000  |
| Si | 2.93256600  | 1.99229100  | 1.26372800  |
| Si | 2.96265300  | 2.09662500  | -1.17269500 |
| Si | 2.90872400  | 0.07424100  | -2.48639200 |
| W  | 4.17556300  | -0.12008800 | -0.00034500 |
| Si | -0.07548700 | -2.02524900 | -1.25918200 |
| Si | -0.05116900 | -2.16940800 | 1.22445700  |
| Si | 0.07485600  | -0.10602500 | 2.50586800  |
| Si | 0.23454300  | 2.14789700  | 1.27676600  |
| Si | 0.05803100  | 2.28318900  | -1.27774800 |
| Si | 0.00442900  | 0.15882200  | -2.53502100 |
| W  | 1.65287200  | 0.01657300  | -0.06253300 |
| Si | -2.69616200 | -2.09982100 | -1.31493900 |
| Si | -2.48899100 | -2.10673400 | 1.10125600  |
| Si | -2.37772000 | 0.02690000  | 2.47654800  |
| Si | -2.25654500 | 2.24249900  | 1.55930100  |
| Si | -2.28066400 | 2.41463200  | -0.81409700 |
| Si | -2.36598200 | -0.04682700 | -2.37676200 |
| W  | -1.04146700 | 0.11763800  | 0.02472000  |
| Si | -5.09615100 | -1.43381400 | -1.35130600 |
| Si | -4.78296700 | -1.78163200 | 1.28928300  |
| Si | -4.78916000 | 0.17941900  | 2.51030200  |
| Si | -4.70091100 | 2.22041000  | 1.25727100  |
| Si | -4.60428300 | 2.49470600  | -1.13720300 |
| Si | -4.61397800 | 0.59391100  | -2.50618500 |
| W  | -3.63759100 | 0.21802100  | 0.01544200  |
| O  | -5.83558400 | -2.65819400 | 0.38478400  |
| C  | -6.87137700 | -1.44932700 | -0.69032800 |
| O  | -8.00752400 | -1.41967100 | -0.49622600 |

**TS2**

|    |            |             |             |
|----|------------|-------------|-------------|
| Si | 5.00889200 | 1.62978400  | 2.01455100  |
| Si | 4.93922500 | 2.68297700  | -0.22445000 |
| Si | 5.01689600 | 1.27425700  | -2.25331600 |
| Si | 5.16077200 | -1.18099900 | -2.05151000 |
| Si | 5.23632700 | -2.23482900 | 0.18111600  |
| Si | 5.15983800 | -0.82833800 | 2.21486600  |
| Si | 2.71393900 | 2.28570200  | 1.01420100  |
| Si | 2.72112600 | 2.06929200  | -1.39965800 |
| Si | 2.84203400 | -0.12344400 | -2.42118300 |
| Si | 2.97138000 | -2.11073100 | -1.03409100 |
| Si | 2.97088400 | -1.88244900 | 1.38177500  |

|    |             |             |             |
|----|-------------|-------------|-------------|
| Si | 2.83653900  | 0.30883200  | 2.41238100  |
| W  | 4.18108400  | 0.17027800  | -0.01302000 |
| Si | -0.09139600 | 2.20193200  | 1.04399500  |
| Si | -0.07284100 | 1.90208500  | -1.45367200 |
| Si | 0.05091600  | -0.36659000 | -2.48489800 |
| Si | 0.19310200  | -2.38004500 | -1.04262000 |
| Si | 0.21596000  | -2.06284700 | 1.47879100  |
| Si | 0.02096300  | 0.22021000  | 2.53053300  |
| W  | 1.65739300  | 0.01779600  | -0.00249200 |
| Si | -2.51732300 | 1.95294100  | 1.14854900  |
| Si | -2.57171400 | 1.95863400  | -1.29657100 |
| Si | -2.38496200 | -0.18083700 | -2.42236900 |
| Si | -2.24465700 | -2.41065300 | -1.12053100 |
| Si | -2.24070900 | -2.38030400 | 1.33378800  |
| Si | -2.37437000 | -0.22430900 | 2.49202800  |
| W  | -1.03917300 | -0.15806400 | 0.02638600  |
| Si | -4.86987100 | 1.76423300  | 0.98196300  |
| Si | -4.95836700 | 1.36232300  | -1.47795600 |
| Si | -4.68890400 | -0.77165000 | -2.43321500 |
| Si | -4.60578200 | -2.59258600 | -0.91183400 |
| Si | -4.64700600 | -2.25453400 | 1.46406800  |
| Si | -4.73998700 | -0.08115500 | 2.44554300  |
| W  | -3.62608200 | -0.31745700 | 0.02091900  |
| O  | -7.00596400 | 1.69151800  | -0.98065100 |
| C  | -6.94768800 | 2.50525000  | -0.05196700 |
| O  | -7.47466100 | 3.38135300  | 0.53255300  |

6)  $W_6Si_{42}$

**TS1**

|    |             |             |             |
|----|-------------|-------------|-------------|
| Si | -2.52606200 | 0.98294000  | -2.33901900 |
| Si | -2.42730400 | 2.48000200  | -0.27135200 |
| Si | -2.42714200 | 1.42150400  | 2.03726200  |
| Si | -2.60290200 | -1.08232300 | 2.23906200  |
| Si | -2.60817900 | -2.55792000 | 0.20446700  |
| Si | -2.56798600 | -1.52909700 | -2.07298300 |
| Si | -0.21693500 | 1.84800900  | -1.46635800 |
| Si | -0.16329200 | 2.06347000  | 0.93964400  |
| Si | -0.22066700 | 0.07992900  | 2.35202200  |
| Si | -0.29411600 | -2.08746300 | 1.32812500  |
| Si | -0.26781200 | -2.28583000 | -1.07815200 |
| Si | -0.26502000 | -0.32960000 | -2.47625800 |
| W  | -1.57851800 | -0.07186600 | -0.04314000 |
| Si | 2.61359300  | 1.93640600  | -1.33079300 |
| Si | 2.58187000  | 2.17616900  | 1.12427800  |

|            |             |             |             |
|------------|-------------|-------------|-------------|
| Si         | 2.50284900  | 0.16055300  | 2.46671400  |
| Si         | 2.42800400  | -2.13556300 | 1.35453600  |
| Si         | 2.62566700  | -2.34821900 | -1.20118000 |
| Si         | 2.61320100  | -0.27772200 | -2.53376100 |
| W          | 1.03373700  | -0.14331800 | -0.07849000 |
| Si         | 5.22460300  | 2.09683500  | -1.39366100 |
| Si         | 5.02796900  | 2.21538700  | 1.01920100  |
| Si         | 4.95895900  | 0.15448100  | 2.48353300  |
| Si         | 4.90335100  | -2.10775500 | 1.67257200  |
| Si         | 4.95893400  | -2.38674700 | -0.69840100 |
| Si         | 4.98351600  | -0.00892300 | -2.37197800 |
| W          | 3.69455700  | -0.10880500 | 0.02642200  |
| Si         | 7.66509500  | 1.51152800  | -1.39530800 |
| Si         | 7.33186100  | 1.96244900  | 1.24372500  |
| Si         | 7.37905200  | 0.04594200  | 2.54557700  |
| Si         | 7.35229600  | -2.05888700 | 1.38179800  |
| Si         | 7.28628100  | -2.43442400 | -1.00908000 |
| Si         | 7.25692400  | -0.58942600 | -2.45639700 |
| W          | 6.26353200  | -0.12880100 | 0.04537800  |
| O          | 8.36360200  | 2.82340300  | 0.30109000  |
| C          | 9.43118700  | 1.60027900  | -0.71439800 |
| O          | 10.56689300 | 1.60784600  | -0.51431000 |
| Si         | -7.81944100 | -2.08648100 | -0.95522800 |
| Si         | -7.79621100 | -0.09156300 | -2.38421800 |
| Si         | -7.70008200 | 2.14843500  | -1.37480400 |
| Si         | -7.63082200 | 2.39198100  | 1.06794300  |
| Si         | -7.66985700 | 0.39698100  | 2.49769900  |
| Si         | -7.75975700 | -1.84581000 | 1.49010900  |
| Si         | -5.57104500 | -1.33046900 | -1.97328000 |
| Si         | -5.50643100 | 1.08019300  | -2.21229800 |
| Si         | -5.40914900 | 2.49409800  | -0.24513900 |
| Si         | -5.39540600 | 1.50610200  | 1.97122100  |
| Si         | -5.47868100 | -0.91069800 | 2.21770600  |
| Si         | -5.55860500 | -2.33268800 | 0.23941400  |
| W          | -6.81042400 | 0.12384700  | 0.03569600  |
| W          | -4.24324600 | 0.03498800  | -0.02539700 |
| <b>TS2</b> |             |             |             |
| Si         | 2.47614400  | 1.42514500  | 2.08423600  |
| Si         | 2.46154400  | 2.51543100  | -0.20685700 |
| Si         | 2.49154900  | 1.08369900  | -2.28976100 |
| Si         | 2.55372400  | -1.43126000 | -2.09179900 |
| Si         | 2.59786900  | -2.52308700 | 0.18335900  |
| Si         | 2.55582100  | -1.09496000 | 2.27534500  |
| Si         | 0.18259800  | 2.11371200  | 1.02427500  |

|    |             |             |             |
|----|-------------|-------------|-------------|
| Si | 0.18813900  | 1.91102700  | -1.37108800 |
| Si | 0.23275700  | -0.26397700 | -2.39557500 |
| Si | 0.29178000  | -2.24920600 | -1.02965400 |
| Si | 0.29850400  | -2.03422800 | 1.36650800  |
| Si | 0.22975100  | 0.13609600  | 2.40116000  |
| W  | 1.58236800  | -0.02834200 | -0.00289900 |
| Si | -2.61073000 | 2.14485400  | 1.05937400  |
| Si | -2.59501600 | 1.86553000  | -1.42896100 |
| Si | -2.55862000 | -0.38685600 | -2.47926000 |
| Si | -2.49327700 | -2.41042700 | -1.05247900 |
| Si | -2.46850000 | -2.12240400 | 1.46304700  |
| Si | -2.57639700 | 0.15277800  | 2.52265300  |
| W  | -1.02669500 | -0.09872400 | 0.00073900  |
| Si | -5.05157900 | 1.99802000  | 1.16478100  |
| Si | -5.09524200 | 2.03094400  | -1.27900600 |
| Si | -4.98996000 | -0.10118000 | -2.42633800 |
| Si | -4.93090000 | -2.34442600 | -1.15029400 |
| Si | -4.93261500 | -2.34519800 | 1.30942200  |
| Si | -4.98964600 | -0.19655700 | 2.48615000  |
| W  | -3.69016800 | -0.16026800 | 0.02492800  |
| Si | -7.41119300 | 1.90010900  | 0.98821600  |
| Si | -7.51014700 | 1.51731500  | -1.48592700 |
| Si | -7.31292600 | -0.62819800 | -2.44727200 |
| Si | -7.29794800 | -2.46635800 | -0.93578100 |
| Si | -7.33232100 | -2.13340700 | 1.44951000  |
| Si | -7.34977800 | 0.04218400  | 2.44689600  |
| W  | -6.25199900 | -0.22295300 | 0.01505400  |
| O  | -9.54330400 | 1.90476600  | -0.98057400 |
| C  | -9.46749300 | 2.70533200  | -0.04206900 |
| O  | -9.97327000 | 3.58573200  | 0.55413200  |
| Si | 7.78693700  | -1.88334900 | 1.37958800  |
| Si | 7.72659900  | 0.32936400  | 2.44584900  |
| Si | 7.66939100  | 2.35832500  | 1.06353400  |
| Si | 7.67343700  | 2.18030300  | -1.38719500 |
| Si | 7.73702300  | -0.03274600 | -2.45358900 |
| Si | 7.79512000  | -2.06306800 | -1.07166900 |
| Si | 5.51713200  | -0.96583200 | 2.18439800  |
| Si | 5.44861700  | 1.45467800  | 2.00248200  |
| Si | 5.41922600  | 2.50455200  | -0.18640900 |
| Si | 5.45784800  | 1.13503700  | -2.19305400 |
| Si | 5.52666100  | -1.28516400 | -2.01096100 |
| Si | 5.55673300  | -2.33583600 | 0.17705800  |
| W  | 6.81241600  | 0.12201800  | -0.00422200 |
| W  | 4.24683500  | 0.04806100  | -0.00393600 |

7) Two adsorbed N<sub>2</sub>O molecules on WSi<sub>12</sub>

**TS1**

|    |             |             |             |
|----|-------------|-------------|-------------|
| Si | 1.38606400  | 0.99045400  | -2.18827000 |
| Si | -0.17567800 | 2.31501200  | -1.05019200 |
| Si | -2.00253500 | 1.19233400  | 0.24614500  |
| Si | -1.85093700 | -1.41363200 | 0.09010100  |
| Si | -0.06601100 | -2.67519100 | -0.71525900 |
| Si | 1.53078400  | -1.36503200 | -1.85364300 |
| Si | 2.66337200  | 1.23281300  | -0.10780400 |
| Si | 1.00970800  | 2.44113800  | 0.99738900  |
| Si | -0.68946800 | 1.27393800  | 2.19405600  |
| Si | -0.77011200 | -1.11330000 | 2.31106600  |
| Si | 1.06886900  | -2.24135100 | 1.32588100  |
| Si | 2.79207500  | -1.09759300 | 0.14701100  |
| W  | 0.31951500  | -0.01742800 | 0.12732800  |
| O  | -1.87296700 | 2.45593100  | -0.83554300 |
| O  | -3.33952700 | 0.28992800  | 0.22497300  |
| C  | -3.16387600 | -1.02823500 | -1.24375600 |
| O  | -3.93834400 | -1.00775300 | -2.07823900 |

**TS2**

|    |             |             |             |
|----|-------------|-------------|-------------|
| Si | 1.80283500  | 1.39200000  | -1.70574100 |
| Si | -0.08868200 | 2.40788500  | -0.80367500 |
| Si | -2.03477300 | 0.89573700  | -0.12181000 |
| Si | -1.78813400 | -1.44804600 | -0.33544900 |
| Si | 0.19545400  | -2.37750000 | -1.22012900 |
| Si | 1.97978500  | -0.97400300 | -1.95039200 |
| Si | 2.66732900  | 1.39785000  | 0.60681000  |
| Si | 0.60377800  | 2.21608400  | 1.44999000  |
| Si | -1.19843900 | 0.79236600  | 2.06891800  |
| Si | -0.81712700 | -1.53434700 | 1.87724400  |
| Si | 1.19674900  | -2.43671400 | 0.97913300  |
| Si | 2.93324200  | -0.95275600 | 0.27876500  |
| W  | 0.47560000  | -0.06259900 | 0.08818900  |
| O  | -1.80452800 | 2.30567300  | -1.00012000 |
| O  | -3.97184600 | 0.85499100  | -0.59454800 |
| C  | -4.23670900 | -0.34687900 | -0.62252400 |
| O  | -4.98642500 | -1.23393900 | -0.72059600 |

**TS3**

|    |             |             |             |
|----|-------------|-------------|-------------|
| Si | -0.29494700 | 2.28126100  | -1.30512100 |
| Si | -1.96530900 | 1.47392600  | 0.07241100  |
| Si | -2.00983300 | -1.24399000 | 0.17322100  |
| Si | -0.20967800 | -2.59416400 | -0.42095800 |
| Si | 1.41995600  | -1.55979600 | -1.79319900 |
| Si | 1.34703200  | 0.79364300  | -2.18025100 |

|            |             |             |             |
|------------|-------------|-------------|-------------|
| Si         | 1.01239700  | 2.45674800  | 0.72528100  |
| Si         | -0.74386500 | 1.63459200  | 2.06066000  |
| Si         | -0.90866300 | -0.72752600 | 2.32612400  |
| Si         | 0.88929900  | -2.11516800 | 1.65507100  |
| Si         | 2.58305700  | -1.17868100 | 0.25884500  |
| Si         | 2.70108500  | 1.13631800  | -0.19262900 |
| W          | 0.26865700  | 0.02086600  | 0.10658100  |
| O          | -3.31524600 | 0.54818600  | -0.02683600 |
| C          | -3.01076300 | -0.81385500 | -1.36833900 |
| O          | -3.59769300 | -0.75584600 | -2.34683100 |
| <b>TS4</b> |             |             |             |
| Si         | -1.03320200 | -2.23318300 | 1.26493800  |
| Si         | -2.80182900 | -1.10769900 | 0.14285100  |
| Si         | -2.67053500 | 1.24625700  | -0.02212300 |
| Si         | -0.93537800 | 2.46683500  | 1.02529900  |
| Si         | 0.77923800  | 1.26121400  | 2.13628400  |
| Si         | 0.80645500  | -1.11141000 | 2.24450100  |
| Si         | 0.06962500  | -2.49546000 | -0.86815300 |
| Si         | -1.57429000 | -1.16108600 | -1.92455600 |
| Si         | -1.39509600 | 1.19669800  | -2.08116000 |
| Si         | 0.37689500  | 2.32900300  | -0.98318200 |
| Si         | 2.04403700  | 1.11661900  | 0.12889900  |
| Si         | 1.85179800  | -1.33323700 | 0.04400100  |
| W          | -0.36637700 | 0.02232600  | 0.10196900  |
| C          | 3.92189000  | -0.04900900 | -0.91218700 |
| O          | 4.89537700  | 0.59546000  | -0.84012400 |
| O          | 3.39619000  | -1.07068300 | -1.35725000 |
